# Supplementary material for: Sparing the control arm using well-characterized diagnostic approaches – the Gart and Buck prevalence estimator for efficacy estimation in single-arm trials
Source: publisher site journal article supplement (doi:10.1515/labmed-2019-0091), 2019-09-18
Supplement: Supplementary file 1 [file labmed-2019-0091_suppl.docx]

**Supplementary material 1**

**Example**

As a hypothetical example, we compare the efficacy estimations of a medical intervention (with and without adjustment for diagnostic accuracy of the endpoint assessment) in a classical double arm trial and in a single arm trial using the procedure suggested above.

Let us assume a double arm trial with medical intervention and control arm undertaken to investigate the efficacy of a medical intervention that acts against a disease. The sample size is 100 per group; the diagnostic test performs with sensitivity and specificity of 0.95 and 0.75. The true but unknown disease incidence in the study arm with intervention shall be 0.20 and in the control arm 0.40. This will result in an intervention efficacy of 0.50.

Assuming that the positive test results are identical with the expected values of the random variable measuring the test positives, we would get 39 and 53 positive results in the intervention and control arms, respectively. The classical approach of efficacy estimation without any adjustment for diagnostic accuracy would lead to an underestimation of intervention efficacy:

Lachenbruch’s sensitivity and specificity adjusted approach (equation 3) leads to

|  |
| --- |

Now let us assume a corresponding single arm trial. There is only one study arm with 200 individuals, all of whom get the medical intervention. In this single arm, 78 individuals tested positive after the medical intervention (the same *proportion* as above, the same diagnostic accuracy of 0.95 sensitivity and 0.75 specificity as above). Approaching the adjusted prevalence estimator (equation 1) leads to an adjusted incidence estimation of 0.20 after intervention.

The predictive value of individuals with the predictor present and of those with the predictor absent is given by *PPVP* = 0.70 and *PPVPC*= 0.20, respectively. A diagnostic test for this predictor with sensitivity of 0.90 and specificity of 0.90 provides 84 positive results among all 200 tested individuals receiving the medical intervention. For the adjusted prevalence of the predictor:

Using Pr*ev*P= 0.40, *PPVP* = 0.70 and *PPVPC*= 0.20, efficacy of the medical intervention can now be estimated with equation (8):

The medical intervention reduced the risk for reaching the endpoint by 50% with the 0.95 Wald confidence interval of (0.180, 0.695). Note, that this confidence interval as well as all following confidence intervals is based on the symmetric Wald confidence interval for the Ln of the risk ratio of the estimated incidences. After antilog back-transformation, we get the non-symmetric confidence interval above.

Unadjusted and adjusted estimations of double arm trials for various combinations of sensitivity and specificity and true intervention efficacies of 0.33 and 0.50 with 0.95 Wald confidence intervals are presented in Table 1. In Table 2 the same scenarios are presented for efficacy estimations in single arm trials expanded by various combinations of predictor accuracy as well as diagnostic test accuracy to estimate the distribution of the predictor among all individuals in the single arm trial.

It is apparent that the confidence intervals for sensitivity and specificity adjusted estimations are larger, especially if the sum of sensitivity and specificity is close to 1. This is not surprising since a diagnostic test with such a poor accuracy provides a high level of uncertainty, as noted in the Methods section. Since only diagnostic accuracy adjusted estimations take into account that diagnostics have an impact on efficacy estimations, the possible uncertainty of larger confidence intervals is not a disadvantage of adjusted approaches since it provides certainty in existing uncertainty. In Table 3, we provide a sensitivity analysis regarding confidence intervals for adjusted efficacy estimations depending on sample size. It is visible that the power of adjusted estimations increases with sample size and/or diagnostic accuracy. Therefore, it should be noted that unadjusted estimations are highly biased and this also holds for their confidence intervals since they ignore the diagnostic uncertainty.

For the last scenario in table 1 and 2 with a true (but unknown) intervention efficacy of 0.5 among the statistical population, we additionally performed a Monte Carlo simulation with 10,000 simulated trials. Every clinical trial was performed as double arm and single arm trial. The sample size per study arm was assumed to be 200. The diagnostic accuracy for the endpoint as well as the predictive values and the diagnostic accuracy for the prognostic factor were assumed to be true for the statistical population but could differ in every of the 10,000 simulated trial populations. The same holds for the incidences of each study group in every simulated trial. For the adjusted efficacy estimations of every simulated trial, the postulated predictive and diagnostic accuracy values were used. These accuracies could be different from the individual accuracies of every simulated trial that would lead to bias in adjusted efficacy estimation. As visible in Table 4 and Figure 1, the mean and median estimations of the adjusted methods are identical with the true efficacy. The unadjusted efficacy estimator underestimates the true intervention efficacy.

Now we demonstrate the approach in an example with practical background. To do this we assume a trial to demonstrate the HIV preventive efficacy of pre-exposure prophylaxis (PrEP) in a population of young HIV-negative men having sex with men (MSM) living a highly promiscuous lifestyle. Since the expected cumulative incidence is very low and there are ethical concerns regarding a control arm without preventive intervention, the trial will be realized as single arm trial with 1000 individuals in the study arm instead of 500 individuals in each of the intervention and control arms. All individuals are HIV-negative at screening and will be treated with PrEP. The follow-up period is defined over the absolute number of acts of intercourse and was set to 100. It is expected that the study period will take up to 2 years. The primary endpoint is the cumulative incidence of HIV. The HIV status will be evaluated every 3 months by conducting standard HIV laboratory diagnostics. The sensitivity is assumed to be 1 and the specificity is assumed to be 0.996, which is consistent with the high diagnostic reliability of HIV standard diagnostics [1, 2]. To estimate the treatment efficacy, the HIV status of potential sexual partners is identified as a predictor for the risk of infection. Quinn et al. and Wilson et al. [3, 4] described the transmission risk based on exposure. This leads to a positive predictive value PPV of 0.32 with 7% of sexual partners being HIV-positive that is consistent with the prevalence in this high-risk population [5]. The negative predictive value is 0, since non-HIV positives cannot transmit HIV infection. Cumulative incidence of HIV-positive individuals under treatment is 22, which is a rate of 0.022. The sensitivity and specificity adjusted HIV incidence rate is 0.003. The efficacy of PrEP is estimated to be 0.86 with a 0.95 confidence interval of (0.21, 0.96).

**References:**

[1] Fiebig EW, Heldebrant CM, Smith RI, Conrad AJ, Delwart EL, Busch MP. Intermittent low-level viremia in very early primary HIV-1 infection. J Acquir Immune Defic Syndr 2005;39:133-7.

[2] Fiebig EW, Wright DJ, Rawal BD, Garrett PE, Schumacher RT, Peddada L, Heldebrant C, Smith R, Conrad A, Kleinman SH, Busch MP. Dynamics of HIV viremia and antibody seroconversion in plasma donors: implications for diagnosis and staging of primary HIV infection. AIDS 2003;17:1871-9.

[3] Quinn TC, Wawer MJ, Sewankambo N, Serwadda D, Li C, Wabwire-Mangen F, Meehan MO, Lutalo T, Gray RH. Viral load and heterosexual transmission of human immunodeficiency virus type 1. Rakai Project Study Group. N Engl J Med 2000;342:921-9.

[4] Wilson DP, Law MG, Grulich AE, Cooper DA, Kaldor JM. Relation between HIV viral load and infectiousness: a model-based analysis. Lancet 2008;372:314-20.

[5] Robert Koch Institut. HIV-Jahresbericht 2015. Epi Bull 2016;38:407-29.

**Tables:**

Table 1: Double arm unadjusted and adjusted efficacy estimations for various diagnostic accuracies and intervention efficacies.

| **Sensitivity and specificity (un-)adjusted efficacy estimation in double arm trials** | | | | | | | | |
| --- | --- | --- | --- | --- | --- | --- | --- | --- |
| ***n*** | ***SeE*** | ***SpE*** | **True efficacy = 1 − 0.2/0.3 = 0.333** | | | **True efficacy = 1 − 0.2/0.4 = 0.5** | | |
| **Expected value for**  **test positive rate**  **Intervention arm**  **Control arm** | **Unadjusted efficacy**  **Estimation**  **(0.95 CI)** | **Adjusted efficacy estimation**  **(0.95 CI)** | **Expected value for**  **test positive rate**  **Intervention arm**  **Control arm** | **Unadjusted efficacy**  **Estimation**  **(0.95 CI)** | **Adjusted efficacy estimation**  **(0.95 CI)** |
| 100 | 0.45 | 0.25 | 0.69  0.66 | -0.045  (-0.127, 0.138) | 0.333  (-1.000, 0.892) | 0.69  0.63 | -0.095  (-0.337, 0.102) | 0.5  (-1.000, 0.909) |
| 0.70 | 0.50 | 0.54  0.56 | 0.035  (-0.239, 0.249) | 0.333  (-1.000, 0.964) | 0.54  0.58 | 0.069  (-0.190, 0.272) | 0.5  (-1.000, 0.967) |
| 0.95 | 0.75 | 0.39  0.46 | 0.152  (-0.172, 0.387) | 0.333  (-0.530, 0.706) | 0.39  0.53 | 0.264  (0.009, 0.323) | 0.5  (-0.076, 0.767) |
| 200 | 0.45 | 0.25 | 0.69  0.66 | -0.045  (-0.198, 0.087) | 0.333  (-1.000, 0.816) | 0.69  0.63 | -0.095  (-0.261, 0.048) | 0.5  (-0.668, 0.850) |
| 0.70 | 0.50 | 0.54  0.56 | 0.035  (-0.151, 0.192) | 0.333  (-1.000, 0.915) | 0.54  0.58 | 0.069  (-0.108, 0.217) | 0.5  (-1.000, 0.927) |
| 0.95 | 0.75 | 0.39  0.46 | 0.152  (-0.066, 0.325) | 0.333  (-0.201, 0.626) | 0.39  0.53 | 0.264  (0.085, 0.407) | 0.5  (0.139, 0.709) |

Table 2: Single arm trial efficacy estimations for various diagnostic accuracies, intervention efficacies, and predictors**.**

| **Gart&Buck based efficacy estimation in single arm trials** | | | | | | | | | | | | |
| --- | --- | --- | --- | --- | --- | --- | --- | --- | --- | --- | --- | --- |
| ***n*** | ***SeE*** | ***SpE*** | ***SeP*** | ***SpP*** | **True efficacy = 1 − 0.2/0.3 = 0.333** | | | | **True efficacy = 1 − 0.2/0.4 = 0.5** | | | |
| ***PPV*** | ***PPVC*** | **Pr*evP*** | **Adjusted efficacy estimation**  **(0.95 CI)** | ***PPV*** | ***PPVC*** | **Pr*evP*** | **Adjusted efficacy estimation**  **(0.95 CI)** |
| 100 | 0.45 | 0.25 | 0.6 | 0.7 | 0.4 | 0.15 | 0.6 | 0.333 (-1.000, 0.853) | 0.5 | 0.25 | 0.6 | 0.5 (-1.000, 0.890) |
| 0.75 | 0.8 | 0.5 | 0.10 | 0.5 | 0.333 (-1.000, 0.853) | 0.6 | 0.2 | 0.5 | 0.5 (-1.000, 0.890) |
| 0,9 | 0.9 | 0.6 | 0.10 | 0.4 | 0.333 (-1.000, 0.853) | 0.7 | 0.2 | 0.4 | 0.5 (-1.000, 0.890) |
| 0.7 | 0.5 | 0.6 | 0.7 | 0.4 | 0.15 | 0.6 | 0.333 (-1.000, 0.941) | 0.5 | 0.25 | 0.6 | 0.5 (-1.000, 0.956) |
| 0.75 | 0.8 | 0.5 | 0.10 | 0.5 | 0.333 (-1.000, 0.941) | 0.6 | 0.2 | 0.5 | 0.5 (-1.000, 0.956) |
| 0.9 | 0.9 | 0.6 | 0.10 | 0.4 | 0.333 (-1.000, 0.941) | 0.7 | 0.2 | 0.4 | 0.5 (-1.000, 0.956) |
| 0.95 | 0.75 | 0.6 | 0.7 | 0.4 | 0.15 | 0.6 | 0.333 (-0.344, 0.666) | 0.5 | 0.25 | 0.6 | 0.5 (-0.003, 0.750) |
| 0.75 | 0.8 | 0.5 | 0.10 | 0.5 | 0.333 (-0.345, 0.666) | 0.6 | 0.2 | 0.5 | 0.5 (-0.004, 0.751) |
| 0.9 | 0.9 | 0.6 | 0.10 | 0.4 | 0.333 (-0.348, 0.667) | 0.7 | 0.2 | 0.4 | 0.5 (-0.006, 0.751) |
| 200 | 0.45 | 0.25 | 0.6 | 0.7 | 0.4 | 0.15 | 0.6 | 0.333 (-0.958, 0.770) | 0.5 | 0.25 | 0.6 | 0.5 (-0.461, 0.828) |
| 0.75 | 0.8 | 0.5 | 0.10 | 0.5 | 0.333 (-0.959, 0.770) | 0.6 | 0.2 | 0.5 | 0.5 (-0.462, 0.829) |
| 0.9 | 0.9 | 0.6 | 0.10 | 0.4 | 0.333 (-0.960, 0.771) | 0.7 | 0.2 | 0.4 | 0.5 (-0.463, 0.829) |
| 0.7 | 0.5 | 0.6 | 0.7 | 0.4 | 0.15 | 0.6 | 0.333 (-1.000, 0.881) | 0.5 | 0.25 | 0.6 | 0.5 (-1.000, 0.911) |
| 0.75 | 0.8 | 0.5 | 0.10 | 0.5 | 0.333 (-1.000, 0.881) | 0.6 | 0.2 | 0.5 | 0.5 (-1.000, 0.911) |
| 0.9 | 0.9 | 0.6 | 0.10 | 0.4 | 0.333 (-1.000, 0.881) | 0.7 | 0.2 | 0.4 | 0.5 (-1.000, 0.911) |
| 0.95 | 0.75 | 0.6 | 0.7 | 0.4 | 0.15 | 0.6 | 0.333 (-0.096, 0.590) | 0.5 | 0.25 | 0.6 | 0.5 (0.181, 0.694) |
| 0.75 | 0.8 | 0.5 | 0.10 | 0.5 | 0.333 (-0.097, 0.590) | 0.6 | 0.2 | 0.5 | 0.5 (0.181, 0.694) |
| 0.9 | 0.9 | 0.6 | 0.10 | 0.4 | 0.333 (-0.098, 0.591) | 0.7 | 0.2 | 0.4 | 0.5 (0.180, 0.695) |

Table 3: Single and double arm trial confidence intervals for low and high diagnostic accuracies by increasing sample size.

|  | | **0.95 Confidence intervals depending on sample size** | | | |
| --- | --- | --- | --- | --- | --- |
| **Scenario 1**  **(low diagnostic accuracy)** | | **Scenario 3**  **(high diagnostic accuracy)** | |
| **n** | **VE** | **Double arm** | **Single arm** | **Double arm** | **Single arm** |
| 100 | 0.5 | (-1, 0.91) | (-1, 0.89) | (-0.08, 0.77) | (-0.01, 0.75) |
| 200 | 0.5 | (-0.67, 0.85) | (-0.46, 0.83) | (0.14, 0.71) | (0.18, 0.70) |
| 400 | 0.5 | (-0.17, 0.79) | (-0.07, 0.77) | (0.27, 0.66) | (0.29, 0.65) |
| 800 | 0.5 | (0.09, 0.73) | (0.15, 0.71) | (0.34, 0.62) | (0.36, 0.61) |
| 1600 | 0.5 | (0.23, 0.67) | (0.27, 0.66) | (0.39, 0.59) | (0.40, 0.58) |
| True efficacy = 1-0.2/0.4=0.5, SpE=0.25, SeP=0.6, SpP= 0.7, PPV=0.5, PPCC=0.25, PrevP=0.25.  Low diagnostic accuracy: SeE= 0.45. High diagnostic accuracy: SeE=0.95 | | | | | |

Table 4: Monte Carlo Simulation for estimated intervention efficacies.

| **Monte Carlo Simulation** | | | | |
| --- | --- | --- | --- | --- |
| **True efficacy 0.5** | **Efficacy estimations (10,000 simulations)** | | | |
| **n=200** | **Mean (SD)** | **Min, Max** | **Median** |
| **Double arm** | **Unadjusted** | 0.263 (0.055) | 0.046, 0.494 | 0.263 |
| **Adjusted** | 0.499 (0.101) | 0.096, 0.967 | 0.499 |
| **Single arm** | **Adjusted** | 0.498 (0.117) | 0.051, 0.920 | 0.500 |

Figure:

Figure 1: Histogram of the Monte Carlo simulation for estimated intervention efficacies over 10,000 simulations.


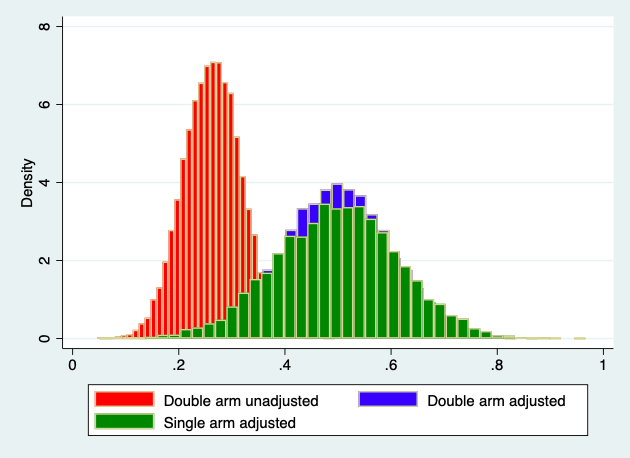


Figure 1
